# Supplementary material
Source: PubMed Central journal article supplement (PMC6599509)
Supplement: NIHMS863569-supplement-Tables.pdf [file NIHMS863569-supplement-Tables.pdf]

Supplemental Table 1. Baseline characteristics of patients and controls

|                                       | AS no gut inflammation (N=20) | AS acute gut inflammation (N=11) | AS chronic gut inflammation (N=19) | Controls (N=20) |
|---------------------------------------|-------------------------------|----------------------------------|------------------------------------|-----------------|
| Age, mean (range) years               | 34 (18-56)                    | 37 (21-55)                       | 33 (20-50)                         | 47 (23-58)      |
| Sex, no. (%) female                   | 5 (25)                        | 3(37)                            | 5 (17)                             | 10 (50)         |
| HLA-B27 (%)                           | 100%                          | 100%                             | 100%                               | -               |
| Disease duration, mean (range) months | 42 (14-60)                    | 38 (11-51)                       | 36 (10-56)                         | -               |
| CRP (mg/l), mean (range)              | 3 (0.5-5)                     | 4 (1.7-8.2)                      | 5 (3-9)                            | -               |
| Axial involvement, no. (%)            | 20 (100)                      | 11 (100)                         | 30 (100)                           | -               |
| Peripheral arthritis, no. (%)         | 3 (15)                        | 2 (18)                           | 6 (20)                             | -               |
| Enthesitis/dactylitis, no. (%)        | 3 (15)                        | 3 (27)                           | 2 (7)                              | -               |
| Uveitis, no. (%)                      | 2 (10)                        | 0 (0)                            | 2 (7)                              | -               |
| ASDAS score, mean (range)             | 3.4 (2.4-4.6)                 | 3.8 (2.8-4.6)                    | 4.4 (3.2-5)                        | -               |
| NSAIDs (%)                            | 5(25)                         | 4 (36)                           | 8 (27)                             | -               |
| Salazopyrin (%)                       | -                             | 36                               | 4 (13)                             | -               |
| Methotrexate (%)                      | -                             | -                                | -                                  | -               |
| TNF-blocking agents (%)               | -                             | -                                | -                                  | -               |

Supplemental Table 2: List of antibodies and primers

| Antibody             | Immunohistochemistry    | Flow cytometry        |
|----------------------|-------------------------|-----------------------|
| Anti-human Occludin  | Dako, Glostrup, Denmark | /                     |
| Anti-human Claudin 4 | Dako, Glostrup, Denmark | /                     |
| Anti-human Zonulin   | LsBio,                  | /                     |
| Anti-human CD31      | Abcam, Cambridge, UK    | /                     |
| Anti-human PV-1      | Abcam, Cambridge, UK    | /                     |
| Anti-human GFAP      | Abcam, Cambridge, UK    | /                     |
| Anti-human CD14      | /                       | Becton, Dickinson USA |
| Anti-human CD163     | /                       | Becton, Dickinson USA |
| Anti-human cMAF      | /                       | Abcam (Cambridge)     |
| Anti-human HLA-DR    | /                       | Abcam (Cambridge)     |
| Anti-human IL-23p19  | /                       | Abcam (Cambridge)     |
| Anti-rat IL-23p19    | Abcam (Cambridge)       | /                     |
| Anti-rat IL-22       | Abcam (Cambridge)       | /                     |
| Anti-rat CD3         | Abcam (Cambridge)       | /                     |
| Anti-rat CD68        | Abcam (Cambridge)       | /                     |
| Anti-LPS             | AbCam (Cambridge)       | /                     |
| Primers              |                         |                       |
| Occludin             | Hs00170162_m1           |                       |
| Claudin 4            | Hs00976831_s1           |                       |
| Zonula Occludens 1   | Hs01551861_m1           |                       |
| Zonulin              | Hs00978377_m1           |                       |
| VE-cadherin          | Hs00170986_m1           |                       |
| JAM-A                | Hs00262270_s1           |                       |
| PV1                  | Hs00229941_m1           |                       |
| 18s                  | Hs99999901_s1           |                       |
| GAPDH                | Hs02758991_g1           |                       |

Supplemental Table 3. Bacteria and histological changes in AS patients and controls

|                                           | <b>Adherent<br/>bacteria:<br/>edema</b> | <b>Adherent<br/>Bacteria:<br/>vasculitis</b> | <b>Adherent<br/>Bacteria:<br/>detachment</b> | <b>Invading<br/>bacteria:<br/>edema</b> | <b>Invading<br/>bacteria:<br/>vasculitis</b> | <b>Invading<br/>bacteria:<br/>detachment</b> |
|-------------------------------------------|-----------------------------------------|----------------------------------------------|----------------------------------------------|-----------------------------------------|----------------------------------------------|----------------------------------------------|
| <b>AS no gut inflammation<br/>(N=20)</b>  | 4                                       | -                                            | -                                            | 4                                       | 4                                            | 4                                            |
| <b>AS acute inflammation<br/>(N=11)</b>   | 5                                       | -                                            | -                                            | 6                                       | 6                                            | 6                                            |
| <b>AS chronic<br/>inflammation (N=19)</b> | 7                                       | -                                            | -                                            | 9                                       | 9                                            | 9                                            |
| <b>Controls<br/>(N=20)</b>                | -                                       | -                                            | -                                            | -                                       | -                                            | -                                            |
